1 **Title:** Comparing three types of dietary samples for prey DNA decay in an insect

2 generalist predator

3

4 STEFANIYA KAMENOVA<sup>1,2,3</sup>, REBECCA MAYER<sup>4</sup>, OSKAR R. RUBBMARK<sup>4</sup>, ERIC

5 COISSAC<sup>5,6</sup>, MANUEL PLANTEGENEST<sup>2</sup> and MICHAEL TRAUGOTT<sup>4</sup>

6

7 <sup>1</sup>Centre d'Etudes Biologiques de Chizé, Villiers-en-Bois, France, <sup>2</sup>Agrocampus Ouest

8 UMR1349 IGEPP, 65 rue de Saint-Brieuc, CS 84215, F-35042 Rennes, France,

9 <sup>3</sup>Integrative Biology, University of Guelph, Guelph, ON, Canada, <sup>4</sup>Mountain Agriculture

10 Research Unit, Institute of Ecology, University of Innsbruck, Technikerstraße 25, 6020

11 Innsbruck, Austria, <sup>5</sup>Université Grenoble-Alpes, Laboratoire d'Ecologie Alpine (LECA),

12 F-38000 Grenoble, France, <sup>6</sup>Centre National de la Recherche Scientifique, Laboratoire

13 d'Ecologie Alpine (LECA), F-38000 Grenoble, France

14

15 Corresponding author: Stefaniya Kamenova

16 Integrative Biology, University of Guelph, 50 Stone Road East, N1G 2W1, Guelph, ON,

17 Canada

18 stefaniya.kamenova@gmail.com

19

20 **Keywords:** diagnostic PCR, molecular diet analysis, prey detection, Carabidae, trophic

21 interactions

22

23 **Running title:** DNA decay in three types of dietary samples

24 **Abstract**

25 The rapidly growing field of molecular diet analysis is becoming increasingly popular  
26 among ecologists, especially when investigating methodologically challenging groups  
27 such as invertebrate generalist predators. Prey DNA detection success is known to be  
28 affected by multiple factors, however the type of dietary sample has rarely been  
29 considered. Here, we address this knowledge gap by comparing prey DNA detection  
30 success from three types of dietary samples. In a controlled feeding experiment, using  
31 the carabid beetle *Pterostichus melanarius* as a model predator, we collected  
32 regurgitates, feces and whole consumers (including their gut contents) at different time  
33 points post-feeding. All dietary samples were analyzed using multiplex PCR targeting  
34 three different length DNA fragments (128 bp, 332 bp and 612 bp). Our results show  
35 that both the type of dietary sample and the size of the DNA fragment contribute to a  
36 significant part of the variation found in the detectability of prey DNA. Specifically, we  
37 observed that in both regurgitates and whole consumers prey DNA was detectable  
38 significantly longer for all fragment sizes than for feces. Based on these observations,  
39 we conclude that prey DNA detected from regurgitates and whole consumers DNA  
40 extracts are comparable, whereas prey DNA detected from feces, though still  
41 sufficiently reliable for ecological studies, will not be directly comparable to the former.  
42 Therefore, regurgitates and feces constitute an interesting, non-lethal source for dietary  
43 information that could be applied to field studies in situations when invertebrate  
44 predators should not be killed.

45

46

## 47 **Introduction**

48 DNA-based diet analysis is rapidly being employed as a widespread tool for  
49 empirically characterizing diet and trophic interactions in a broad range of vertebrates  
50 and invertebrates (Traugott *et al.* 2013; Clare 2015). DNA-based methods for diet  
51 analysis typically rely on the detection of short fragments of prey DNA, recovered from  
52 predator's gut contents (*e.g.* Leray *et al.* 2015; Mollot *et al.* 2014) or other types of  
53 dietary samples such as feces, regurgitates, or whole consumers (*e.g.* Ibanez *et al.*  
54 2013; Kartzinel *et al.* 2015; Thalinger *et al.* 2016; Wallinger *et al.* 2015). The success of  
55 DNA-based approaches to analyze trophic interactions is mainly due to the fact that  
56 they allow the direct and accurate identification of trophic links from minute amount of  
57 starting material, even for very small-sized organisms such as mites (Pérez-Sayas *et al.*  
58 2015) or zooplankton (Durbin *et al.* 2012). Furthermore, the rapid growth of public  
59 sequence databases and methodological improvements in detection sensitivity and  
60 high-throughput technology, offer time- and cost-effective procedures applicable to a  
61 great variety of ecological systems and to large sample sizes (*e.g.* Valentini *et al.* 2009;  
62 Pompanon *et al.* 2012; Sint *et al.* 2011).

63 DNA-based diet analysis is particularly valuable for studying invertebrate  
64 generalist predators (Symondson 2012). Indeed, DNA methods offer a sensitive and  
65 flexible alternative to traditional behavioural or dissecting techniques that often fail to  
66 detect prey that does not leave hard remains in these cryptic liquid feeders (Traugott *et*  
67 *al.* 2013). DNA techniques are, however, also subject to bias and prey DNA detection  
68 success could be hampered by a variety of factors among which the type of dietary  
69 sample could play an important role (King *et al.* 2008; Pompanon *et al.* 2012; Traugott

70 *et al.* 2013). In the case of arthropods, whole body extracts are usually the most  
71 convenient source of dietary DNA that avoid laborious dissections. Besides the  
72 drawbacks of a lethal approach (e.g. sacrificing rare or endangered species; affecting  
73 population dynamics, etc.), whole body extracts may pose additional challenges  
74 especially in the case of DNA metabarcoding diet analysis. As DNA metabarcoding  
75 combines general primers and high-throughput sequencing, the concomitant  
76 amplification of consumer DNA usually compromises the detection success of scarcer  
77 and degraded prey DNA (e.g. Shehzad *et al.* 2012; Piñol *et al.* 2014).

78 Waldner & Traugott (2012) demonstrated that regurgitates, a fluid mixture  
79 containing semi-digested prey remains and digestive enzymes, obtained from predatory  
80 carabid beetles provided superior prey DNA detection rates compared to whole body  
81 DNA extracts. Another prospective source of food DNA are feces, although their use as  
82 a dietary source in invertebrates is still uncommon (e.g. Ibanez *et al.* 2013; Redd *et al.*  
83 2014; Sint *et al.* 2015). Usually, both regurgitates and feces seem to provide similar or  
84 better detection rates compared to whole body extracts (Durbin *et al.* 2012; Egeter *et al.*  
85 2015; Unruh *et al.* 2016), and contain comparatively much less consumer DNA, making  
86 them putatively an ideal source for metabarcoding diet analysis. Nevertheless, to date  
87 we lack a comparative and quantitative assessment of the respective efficiency in  
88 detection success between whole bodies, regurgitates and feces as well as prospective  
89 interactions with other sources of non-dietary variation such as the target DNA fragment  
90 size.

91 In this study, we address this knowledge gap by comparing the prey DNA  
92 detection rates for three types of dietary samples: whole consumers including their gut

93 content, regurgitates and feces. Using a controlled feeding experiment involving a  
94 widespread carabid predator, *Pterostichus melanarius* (Coleoptera: Carabidae) we test  
95 the following hypotheses: (i) post feeding prey DNA detection success should be similar  
96 or better in regurgitates compared to whole beetles due to lesser degradation of prey  
97 DNA in the former; (ii) prey DNA detection success should be lower in feces compared  
98 to regurgitates and whole bodies as faecal material represents the final stage of the  
99 digestion process; and (iii) prey DNA detection should decrease with increasing DNA  
100 fragment size and the time post-feeding for all types of samples.

101

## 102 **Material & Methods**

103

### 104 **Sampling and maintenance of predators**

105 *Pterostichus melanarius* individuals were collected by dry pitfall traps in two  
106 adjacent maize fields situated at the experimental site of INRA Le Rheu (Ille-et-Vilaine,  
107 France; GPS coordinates: 48.10744282N; 1.78830482W). Regular 24-hour trapping  
108 sessions were conducted in July – August 2013 until a sufficient number of individuals  
109 had been collected. All living beetles were brought to the laboratory where they were  
110 identified to species level and individually placed in plastic containers filled with loam.  
111 Beetles were stored at room temperature and continuously provided with water and  
112 food (field-collected earthworms and small pieces of apple).

113

### 114 **Feeding experiment**

115 Prior to the feeding experiment, beetles were starved for 96 h in fresh individual  
116 plastic Petri dishes (5 cm diameter) containing only a droplet of water. After the  
117 starvation period, all beetles were transferred to a new Petri dish and provided with one  
118 freshly freeze-killed mealworm (*Tenebrio molitor*, Coleoptera: Tenebrionidae) cut in half.  
119 Carabids were allowed to feed for one hour in a dark climatic chamber at 20°. After  
120 feeding all beetles which had fully consumed the mealworm were transferred into fresh  
121 Petri dishes with no food. Beetles were stored at room temperature and continuously  
122 provided with water during the experiment.

123 For the “whole beetle” treatment, batches of 10 randomly chosen carabids were  
124 frozen in 2-mL reaction tubes by immersion in liquid nitrogen at 0, 12, 24, 36, 48, 60, 72  
125 and 96 hours post-feeding. Immersion in liquid nitrogen was necessary as previous  
126 tests showed that living beetles do not die immediately after placement at -20°C,  
127 leading them to regurgitate into the reaction tube. After immersion, all whole beetles  
128 were stored at -20°C. Thirteen starved beetles were never allowed to feed and they  
129 were freeze-killed at 0 h to be used as negative controls. For the “regurgitate” treatment,  
130 batches of 10 randomly chosen individuals were allowed to regurgitate on a cotton wool  
131 tip according to the protocol described in Waldner & Traugott (2012) at 0, 12, 24, 36, 48,  
132 60, 72 and 96 h post-feeding. After regurgitation, all beetles per given time-point were  
133 freeze-killed and stored at -20°C. Exactly the same procedure at each time point was  
134 applied on a control tip without touching a beetle for checking potential DNA carry-over  
135 contaminations. All samples were stored at -20°C prior to DNA extraction and PCR. For  
136 the “feces” treatment, 20 carabid beetles were placed in new Petri dishes after feeding  
137 with a droplet of clean water. Carabids were continuously checked for feces production

138 at every 6 hours. Detected feces were immediately frozen within the Petri dish at -20°C  
139 whereupon the corresponding carabid individual was transferred into a new Petri dish.  
140 Feces production was monitored until all beetles died.

141

## 142 **Molecular diet analysis**

143 Regurgitate and fecal samples were directly lysed in 200 µl TES Lysis Buffer  
144 (Macherey-Nagel, Germany) and 5 µl Proteinase K (10 mg/mL) overnight at 56°C. The  
145 whole beetles were previously ground using three 4 mm stainless steel beads (Lemoine  
146 S.A.S, Rennes, France) within a volume of 620 µl TES Lysis Buffer and 10 µl  
147 Proteinase K (10 mg/mL) per beetle. Tissues were disrupted by a 1-minute bead-  
148 beating step using a professional paint mixer (Fluid Management Inc., Wheeling, IL,  
149 USA). All samples were incubated overnight at 56°C. Respectively 2, 6, and 2 lysate  
150 blanks (i.e. no DNA material) were carried out for the whole beetles, fecal and  
151 regurgitate treatments. DNA was extracted in batches of 92 samples using the Biosprint  
152 96 DNA Blood Kit (Qiagen, Hilden, Germany) on a Biosprint 96 extraction robotic  
153 platform (Qiagen) following the manufacturer's instructions. DNA was finally diluted in  
154 200 µl TE buffer (0.1 M TRIS, pH 8, 10 mM EDTA) and the extracts were stored at -28  
155 °C. To avoid contamination, DNA extractions were done in a separate pre-PCR  
156 laboratory using a UVC-equipped laminar flow hood. To check for sample-to-sample  
157 cross-contamination, four extraction negative controls (PCR-grade RNase-free water  
158 instead of lysate) were included within each batch of 92 samples. All of these controls  
159 tested negative using the diagnostic PCR assay described below.

160 The DNA extracts were screened with a multiplex PCR assay targeting three  
161 overlapping COI mtDNA fragments of *T. molitor*, i.e. 128 bp, 332 bp and 612 bp. The  
162 primer mix contained 6  $\mu\text{M}$  of primers Ten-mol-S210 (5'-  
163 TACCGTTATTCGTATGAGCAGTAT-3') and Ten-mol-A212 (5'-  
164 CGCTGGGTCAAAGAAGGAT-3') as well as 2  $\mu\text{M}$  of primers Ten-mol-S232 (5'-  
165 TAATAAGAAGAATTGTAGAAAACGGG-3') and Ten-mol-S231 (5'-  
166 TCATTTTTGGAGCGTGATCC-3') (Oehm *et al.* 2011; Sint *et al.* 2011). Each 10  $\mu\text{l}$  PCR  
167 consisted of 1.5  $\mu\text{l}$  template DNA, 5.0  $\mu\text{l}$  of 2x Multiplex PCR Kit reaction mix (Qiagen),  
168 1.0  $\mu\text{l}$  of primer mix, 0.5  $\mu\text{l}$  of bovine serum albumin (BSA, 10 mg ml<sup>-1</sup>), and 2.0  $\mu\text{l}$  of  
169 PCR-grade RNase-free water (Qiagen) to adjust the volume. Thermocycling was  
170 conducted in Eppendorf Mastercyclers (Eppendorf, Hamburg Germany) and cycling  
171 conditions were 15 min at 95 °C, 35 cycles of 30 sec at 94 °C, 90 sec at 63 °C, 1 min at  
172 72 °C, and final elongation 10 min at 72 °C. To check for amplification success and  
173 DNA carry-over contamination, two positive (mealworm DNA) and two negative controls  
174 (PCR water instead of DNA) were included within each PCR, respectively.

175 The PCR products obtained were visualized using QIAxcel, an automated capillary  
176 electrophoresis system (Qiagen), with method AL320. The results were scored with  
177 Biocalculator Fast Analysis Software version 3.0 (Qiagen) and the threshold was set to  
178 0.07 relative fluorescent units. Samples above this threshold and showing the expected  
179 fragment length were counted as positives. All DNA extracts that were tested negative  
180 in the first run were re-tested with general primers (Folmer *et al.* 1994) in a second PCR  
181 to check for any amplifiable DNA (all of these samples tested positive). To ensure



182 contamination-free conditions, PCR preparation and visualization of PCR products were  
183 done in two separate laboratories (workflow: from pre- to post-PCR areas).

184

## 185 **Statistical analyses**

186 A generalized linear mixed model was built to fit a logistic regression on the DNA  
187 detection data. We integrated three fixed effects into the model: two qualitative factors,  
188 the marker size (128 bp, 332 bp, 612 bp) and the sample type (regurgitates, feces or  
189 whole body DNA extracts), and one continuous variable, the time post-feeding. To  
190 compensate for non-independence in collection of feces individuals were included as a  
191 random effect. The model was fitted using the *glmm* function from the R package  
192 “*glmm*” (<https://cran.r-project.org/web/packages/glmm>). Models were fit using a Monte  
193 Carlo sample size of 1024 with 10,000 iterations. The distribution of each of the model  
194 parameters was approximated to a normal distribution using the maximum goodness-of-  
195 fit estimation with the “*fitdist*” function available in the R package “*fitdistrplus*”  
196 (Delignette-Muller & Dutang 2015). The variance in detectability rates explained by the  
197 model was estimated using the coefficient of determination method (Tjur 2009). Tests of  
198 the differences between mean detectability rates for each of the qualitative factors  
199 (marker length and sample type) were conducted using a Z-test. The time point for a  
200 prey detection probability of 50% (i.e. the time point at which on average half of the  
201 individuals show positive for the target prey) was determined for each dietary sample  
202 and DNA fragment size. To compensate for false discovery rate in multiple testing  
203 comparisons between fragments were based on 95% confidence limits (CI) as

204 suggested by Greenstone et al (2013). All statistical analyses were conducted using the  
205 R software (R Core Team 2013).

206

## 207 **Results**

208 Detectability of mealworm DNA in *P. melanarius* decreased with increasing post-  
209 feeding time and prey DNA fragment length for the three dietary samples (Fig. 1, small  
210 vs medium and small vs large fragments:  $p < 0.001$ ; medium vs large fragment:  $p = 0.08$ ),  
211 with post-feeding detection time intervals being longest for the shortest DNA fragment  
212 (Fig. 1 A, B, C). We also observed a significant effect of the dietary sample type, with  
213 prey DNA detection success being significantly lower in feces compared to regurgitates  
214 and whole beetles for all the three fragment sizes (Fig. 1, in all cases  $p < 0.001$ ). There  
215 was also a tendency for longer post-feeding detection periods in regurgitates compared  
216 to whole beetles (Fig. 1A, B) but differences were not significant ( $p = 0.6$ ). Our model  
217 fitted the data well for all of the three dietary samples: regurgitates (Fig. 1A), whole  
218 beetles (Fig. 1B) and feces (Fig. 1C), and explained 50% of the variance in DNA  
219 detectability. Raw data are presented in Table 1. For the small prey DNA fragment, 50%  
220 detection time was the highest for regurgitates (94 hours) but the value significantly  
221 dropped by more than half for the medium fragment (42 hours) and was significantly  
222 shortest for the largest prey DNA fragment (30.6 hours; Table 2). In feces 50%  
223 detection probabilities were the lowest for all the three DNA fragment sizes, with only 19  
224 hours for the largest DNA fragment (612 pb) and a significantly shorter detection  
225 probability for the medium prey DNA fragment when compared to the regurgitate  
226 samples (Table 2).

227

## 228 **Discussion**

229           How long prey DNA can be detected in a sample is determined by a range of  
230 interacting factors related to the environment, the predator-prey system and the  
231 molecular techniques used. These might affect results, but how is difficult to disentangle  
232 without conducting comprehensive experiments that explicitly account for factor  
233 multiplicity. Here, we compared multiple dietary samples from one species of  
234 invertebrate consumer, in a controlled feeding experiment, and assessed how the  
235 combined effects of the type of dietary sample and DNA fragment size will affect the  
236 prey DNA detection probability over time since feeding. Our results show that each of  
237 these factors significantly affects the rate at which the probability of detecting prey DNA  
238 decreases over time. Consistent with our hypothesis, the time during which DNA could  
239 be detected was the longest for regurgitates, for each of the three tested prey DNA  
240 fragment sizes. While this was not significantly different from DNA detected from whole  
241 beetles, prey DNA contained in feces was detectable for a significantly shorter time for  
242 all three fragment sizes.

243           Our results support the general assumption that regurgitates constitute a good  
244 alternative source of prey DNA (Waldner & Traugott 2012; Wallinger *et al.* 2015). Such  
245 an alternative could be particularly useful in manipulative food web experiments, where  
246 the removal and killing of the targeted predators during sampling could disturb the  
247 system under study. As 79% of predaceous land-dwelling arthropods use extra-oral  
248 digestion (Cohen 1995), this approach is potentially applicable to a large array of taxa  
249 and ecological situations. Furthermore, by containing comparatively less predator DNA,

250 regurgitates could also be a valuable source of dietary data in DNA metabarcoding  
251 studies involving the use of general primers (Waldner & Traugott, 2012).

252         Nevertheless, the use of regurgitates could entail some additional limitations  
253 such as the detection of only the most recent diet items, and probably represents  
254 merely a narrow fraction of individual's diet, especially in generalist feeders with  
255 frequent switching behavior such as carabids (Lövei & Sunderland, 1996). Thus, the  
256 choice of the most appropriate dietary sample will most likely consist in a trade-off  
257 between DNA detection rates and representativeness in terms of diet according to the  
258 focus of interest.

259         Fecal samples could provide a more integrated picture of individual's diet. Our  
260 results show that overall prey DNA detection was lower compared to regurgitates and  
261 whole bodies. Note, however, that this was true only for the medium sized fragment  
262 when considering the 50% prey DNA detection probability, with significantly lower post-  
263 feeding interval found in feces compared to regurgitates. This indicates that feces  
264 overall are a good source of dietary DNA at least in *P. melanarius* beetles. Similarly,  
265 earlier study in wolf spiders showed that prey DNA was detectable in spider feces albeit  
266 in lower rates compared to whole body DNA extracts (Sint *et al.* 2015). As spiders  
267 represent an important group of generalist feeders that typically do not regurgitate, the  
268 sole non-lethal dietary sample that could be collected are feces. Also, we cannot rule  
269 out the possibility that in our case DNA prey detection success in feces was lower  
270 simply due to the constraints of the experiment. As carabids were checked for feces  
271 every 6 hours, feces deposited earlier within that timeframe could have experienced

272 higher DNA degradation due to longer exposure to ambient temperature, thus resulting  
273 in increased variability in DNA prey detection success.

274 In a recent paper Unruh et al. (2016) even show that there is no difference in  
275 DNA detection between whole bodies and feces in the insect predator *Forficula*  
276 *auricularia*. While the authors do not discuss the possible mechanisms behind this  
277 observation, results tend to suggest that feces could be at least as good dietary source  
278 as whole body extracts for predatory insects such as *F. auricularia*. Hence, feces  
279 remain a viable non-lethal dietary source in certain situations, as detection rates are  
280 generally high.

281 Yet, the question of the time it takes for prey DNA to travel through the digestive  
282 tract of insects and how this varies across different taxa remains. Having a better  
283 understanding about the temporal aspects of digestion in insects in general, and  
284 particularly in carabid beetles is important. Carabids are generalist, mobile feeders with  
285 frequent switching behavior (Lövei & Sunderland, 1996) meaning that frequent diet  
286 shifts but long prey DNA retention periods may result for instance in an overestimation  
287 of consumption rates or in a mismatch between diet composition and estimations of  
288 prey availability at the place where dietary samples were collected. We also usually do  
289 not consider whether this problem could be exacerbated in herbivorous species as the  
290 digestion process of plant DNA in insects can last much longer as compared to animal  
291 DNA (Staudacher *et al.* 2011; Wallinger *et al.* 2013, 2015). For instance, results have  
292 shown that <sup>14</sup>C-inulin labelled prey in carabid beetles could still be detected in feces up  
293 to five days post-feeding (Cheeseman and Gillott 1987). It will be interesting to confront  
294 these findings with observations about prey DNA transit.

295           Here, we also show that prey DNA detection continuously decreases over time  
296 for all the three types of dietary samples, with longer fragments (332-612 bp) decaying  
297 more rapidly compared to the shorter one (128 bp). These results meet our  
298 expectations and corroborate the general idea that digested DNA molecules break  
299 down relatively quickly and that the size of the targeted prey DNA fragment affects post-  
300 feeding prey DNA detection (Agustí *et al.* 2003; von Berg *et al.* 2008). In line with  
301 previous studies, our results support the idea that targeting short to medium size DNA  
302 fragments in DNA diet analysis is essential in order to maximize the prey detection  
303 (Deagle *et al.* 2006; Valentini *et al.* 2009). Nonetheless, if a recent feeding event is the  
304 focus, then targeting longer fragments might actually be a better strategy to ensure that  
305 only the most recent prey items are detected. Additionally, as in DNA metabarcoding  
306 diet analysis there is generally a trade-off between DNA fragment length and taxonomic  
307 resolution, targeting longer DNA fragments – within a certain range - could indeed  
308 improve the taxonomic discrimination of prey species (Pompanon *et al.* 2012). In this  
309 study, the most important observed source of variation in terms of prey DNA detection,  
310 besides time post feeding, is DNA fragment size. This could have profound implications  
311 in metabarcoding studies where the DNA fragment size usually needs to be optimized in  
312 order to meet criteria for both optimal detectability and taxonomic resolution (Taberlet *et*  
313 *al.* 2012). It would be interesting to simultaneously explore the decay rate of a larger  
314 array of DNA fragments of different lengths in order to assess whether a general  
315 relationship between DNA length and detectability can be drawn despite the many other  
316 sources of variability detected in previous studies. One might speculate that a  
317 consistent relationship between DNA detection success and DNA fragment size could

318 be further used as a raw predictor of post feeding prey DNA detection intervals based  
319 solely on prey DNA fragment length.

320 In general, our findings show that quantitative analyses of diet based on different  
321 DNA fragment sizes or on different dietary samples are not directly comparable. Our  
322 study suggests that for estimating and comparing consumption rates for the same  
323 species between studies using different DNA fragment sizes or different dietary samples  
324 (whole beetles/regurgitates vs feces), values should be corrected after taking into  
325 account differences in detection probabilities (e.g. Greenstone *et al.* 2010).  
326 Nevertheless, prey DNA detection depends on numerous additional factors including  
327 species identity of the prey or the predator (Hosseini *et al.* 2008; Wallinger *et al.* 2013),  
328 the feeding mode (Greenstone *et al.* 2007, 2013), the time since the last meal, the  
329 number/size or the quality of prey consumed (Hoogendoorn & Heimpel 2001; Harper *et*  
330 *al.* 2005; Eitzinger *et al.* 2014), which we did not investigate here. The next step  
331 therefore would be the integration of multiple sources of variation in a complex  
332 multispecies, multifactorial experimental design where the different sources of variation  
333 could be quantified at once, and hierarchized (Welch *et al.* 2014).

334

### 335 **Acknowledgements**

336 We thank Paul Abrams for his invaluable help with early analyses of data presented  
337 here. This study was funded by the French National Research Agency (Peerless  
338 project ANR-12-AGRO-0006). S.K. was funded by the Atlantic Canada Opportunities  
339 Agency. R.M. was supported by a grant of the regional government of Tyrol ("Land  
340 Tirol") provided by the Mountain Agriculture Research Unit of the University of

341 Innsbruck. We also thank the three anonymous referees for their pertinent suggestions  
342 which helped improve the present manuscript.

343

#### 344 **Data Accessibility**

345 All the data used in this manuscript are included in the figure and the table presented  
346 within the paper.

347

#### 348 **Author Contributions**

349 MT, SK and MP designed the experiment. SK realized the field work and the feeding  
350 experiment. RM carried out molecular analyses. ORR and EC realized data analyses.  
351 SK wrote the manuscript with input from all the authors.

352

353 **Conflicts of Interest:** The authors have declared that no competing interests exist.

354



## 355 Bibliography

356

357 Agustí N, Shayler SP, Harwood JD, Vaughan IP, Sunderland KD, Symondson WOC  
358 (2003) Collembola as alternative prey sustaining spiders in arable ecosystems: prey  
359 detection within predators using molecular markers. *Molecular Ecology*, **12**,  
360 3467e3475.

361

362 Cheeseman MT, Gillott C (1987) Organization of protein digestion in adult *Calosoma*  
363 *calidum* (Coleoptera: Carabidae). *Journal of Insect Physiology*, **33**, 1-8.

364

365 Clare EL (2015) Molecular detection of trophic interactions: Emerging trends, distinct  
366 advantages, significant considerations and conservation applications. *Evolutionary*  
367 *Applications*, **7**, 1144-1157.

368

369 Cohen AC (1995) Extra-oral digestion in predaceous terrestrial Arthropoda. *Annual*  
370 *review of entomology*, **40**, 85–103.

371

372 Deagle BE, Eveson JP, Jarman SN (2006) Quantification of damage in DNA  
373 recovered from highly degraded samples—a case study on DNA in faeces. *Frontiers*  
374 *in Zoology*, **3**, 1.

375

376 Delignette-Muller ML, Dutang C (2015) fitdistrplus: An R package for fitting  
377 distributions. *Journal of statistical software*, **4**, 1-34.

378

379 Durbin EG, Casas MC, Ryneerson TA (2012) Copepod feeding and digestion rates  
380 using prey DNA and qPCR. *Journal of Plankton Research*, **34**, 72-82.

381

382 Egeter B, Bishop PJ, Robertson BC (2015) Detecting frogs as prey in the diets of  
383 introduced mammals: a comparison between morphological and DNA-based diet  
384 analyses. *Molecular Ecology Resources*, **15**, 306–316.

385

386 Eitzinger B, Unger EM, Traugott M, Scheu S (2014) Effects of prey quality and  
387 predator body size on prey DNA detection success in a centipede predator.  
388 *Molecular Ecology*, **23**, 3767-3776.

389

390 Folmer O, Black M, Hoeh W et al. (1994) DNA primers for amplification of  
391 mitochondrial cytochrome c oxidase subunit I from diverse metazoan invertebrates.  
392 *Molecular Marine Biology and Biotechnology*, **3**, 294-299.

393

394 Greenstone MH, Payton ME, Weber DC, Simmons AM (2013) The detectability half-  
395 life in arthropod predator-prey research: what it is, why we need it, how to measure  
396 it, and how to use it. *Molecular Ecology*, **23**, 3799-3813.

397

398 Greenstone MH, Rowley DL, Weber DC, Payton ME, Hawthorne DJ (2007) Feeding  
399 mode and prey detectability half-lives in molecular gut-content analysis: an example

- 400 with two predators of the Colorado potato beetle. *Bulletin of Entomological*  
401 *Research*, **97**, 201–209.
- 402  
403 Greenstone MH, Szendrei Z, Payton ME, Rowley DL, Coudron TC, Weber DC  
404 (2010) Choosing natural enemies for conservation biological control: use of the prey  
405 detectability half-life to rank key predators of Colorado potato beetles. *Entomologia*  
406 *Experimentalis et Applicata*, **136**, 97-107.
- 407  
408 Harper GL, King RA, Dodd CS, Harwood JD, Glen DM et al. (2005) Rapid screening  
409 of invertebrate predators for multiple prey DNA targets. *Molecular Ecology*, **14**, 819-  
410 827.
- 411  
412 Hoogendoorn M, Heimpel GE (2001) PCR-based gut content analysis of insect  
413 predators: using ribosomal ITS-1 fragments from prey to estimate predation  
414 frequency. *Molecular Ecology*, **10**, 2059-2067.
- 415  
416 Hosseini R, Schmidt O, Keller MA (2008) Factors affecting detectability of prey DNA  
417 in the gut contents of invertebrate predators: a polymerase chain reaction-based  
418 method. *Entomologia Experimentalis et Applicata*, **126**, 194–202.
- 419  
420 Ibanez S, Manneville O, Miquel C *et al.* (2013) Plant functional traits reveal the  
421 relative contribution of habitat and food preferences to the diet of grasshoppers.  
422 *Oecologia*, **173**, 1459–1470.
- 423  
424 Kartzinel TR, Chen PA, Coverdale TC *et al.* (2015) DNA metabarcoding illuminates  
425 dietary niche partitioning by African large herbivores. *Proceedings of the National*  
426 *Academy of Sciences*, **112**, 8019–8024 (2015).
- 427  
428 King RA, Read DS, Traugott M, Symondson WOC (2008) Molecular analysis of  
429 predation: a review of best practice for DNA-based approaches. *Molecular Ecology*,  
430 **17**, 947-963.
- 431  
432 Leray M, Meyer CP, Mills SC (2015) Metabarcoding dietary analysis of coral  
433 dwelling predatory fish demonstrates the minor contribution of coral mutualists to  
434 their highly partitioned, generalist diet. *PeerJ*, **3**, e1047.
- 435  
436 Lövei GL, Sunderland KD (1996) Ecology and behavior of ground beetles  
437 (Coleoptera: Carabidae). *Annual review of entomology*, **41**, 231–256.
- 438  
439 Mollot G, Duyck P-F, Lefeuvre P *et al.* (2014) Cover Cropping Alters the Diet of  
440 Arthropods in a Banana Plantation: A Metabarcoding Approach. *PLoS ONE*, **9**,  
441 e93740.
- 442  
443 Oehm J, Juen A, Nagiller K et al. (2011) Molecular scatology: how to improve prey  
444 DNA detection success in avian faeces? Improving prey DNA detection in avian  
445 faeces. *Molecular Ecology Resources*, **11**, 620–628 (2011).

- 446  
447 Pérez-Sayas, C, Pina T, Gómez-Martínez MA *et al.* (2015) Disentangling mite  
448 predator-prey relationships by multiplex PCR. *Molecular Ecology Resources*, **15**,  
449 1330–1345.
- 450  
451 Piñol J, San Andrés V, Clare EL *et al.* (2014) A pragmatic approach to the analysis  
452 of diets of generalist predators: the use of next-generation sequencing with no  
453 blocking probes. *Molecular Ecology Resources*, **14**, 18–26.
- 454  
455 Pompanon F, Deagle BE, Symondson WOC *et al.* (2012) Who is eating what: diet  
456 assessment using next generation sequencing. *Molecular Ecology*, **21**, 1931–1950.
- 457  
458 Redd KS, Ling SD, Frusher SD, Jarman S, Johnson CR (2014) Using molecular  
459 prey detection to quantify rock lobster predation on barrens-forming sea urchins.  
460 *Molecular Ecology*, **23**, 3849–3869.
- 461  
462 Shehzad W, Riaz T, Nawaz MA *et al.* (2012) Carnivore diet analysis based on next-  
463 generation sequencing: application to the leopard cat (*Prionailurus bengalensis*) in  
464 Pakistan. *Molecular Ecology*, **21**, 1951–1965.
- 465  
466 Sint D, Raso L, Kaufmann R *et al.* (2011) Optimizing methods for PCR-based  
467 analysis of predation. *Molecular Ecology Resources*, **11**, 795–801.
- 468  
469 Sint D, Thurner I, Kaufmann R, Traugott M (2015) Sparing spiders: Faeces as a  
470 non-invasive source of DNA. *Frontiers in Zoology*, **12**, doi:10.1186/s12983-015-  
471 0096-y
- 472  
473 Staudacher K, Wallinger C, Schallhart N, Traugott M (2011) Detecting ingested plant  
474 DNA in soil-living insect larvae. *Soil Biology & Biochemistry*, **43**, 346-350.
- 475  
476 Symondson, W.O.C., 2012. The molecular revolution: using polymerase chain  
477 reaction based methods to explore the role of predators in terrestrial food webs. In:  
478 Gurr, G.M., Wratten, S.D., Snyder, W.E., Read, D.M.Y. (Eds.), *Biodiversity and*  
479 *Insect Pests: Key Issues for Sustainable Management*. Wiley and Sons, pp. 166–  
480 184.
- 481  
482 Thalinger B, Oehm J, Mayr H *et al.* (2016) Molecular prey identification in Central  
483 European piscivores. *Molecular Ecology Resources*, **16**, 123–137.
- 484  
485 Tjur T (2009) Coefficients of Determination in Logistic Regression Models—A New  
486 Proposal: The Coefficient of Discrimination. *The American statistician*, **63**, 366–372.
- 487  
488 Traugott M, Kamenova S, Ruess L *et al.* (2013) Empirically characterising trophic  
489 networks: what emerging DNA-based methods, stable isotope and fatty acid  
490 analyses can offer. *Advances in Ecological Research*, **49**, 177.
- 491

- 492 Unruh TR, Miliczky ER, Horton DR *et al.* (2016) Gut content analysis of arthropod  
493 predators of codling moth in Washington apple orchards. *Biological Control*,  
494 doi:10.1016/j.biocontrol.2016.05.014  
495
- 496 Valentini A, Miquel C, Muhammad AN *et al.* (2009) New perspectives in diet analysis  
497 based on DNA barcoding and parallel pyrosequencing: the trnL approach. *Molecular*  
498 *Ecology Resources*, **9**, 51-60.  
499
- 500 Von Berg K, Traugott M, Symondson WOC (2008) The effects of temperature on  
501 detection of prey DNA in two species of carabid beetle. *Bulletin of Entomological*  
502 *Research* **98**, 263-269.  
503
- 504 Waldner T, Sint D, Juen A *et al.* (2013) The effect of predator identity on post-  
505 feeding prey DNA detection success in soil-dwelling macro-invertebrates. *Soil*  
506 *Biology and Biochemistry*, **63**, 116–123.  
507
- 508 Waldner T, Traugott M (2012) DNA-based analysis of regurgitates: a noninvasive  
509 approach to examine the diet of invertebrate consumers. *Molecular Ecology*  
510 *Resources*, **12**, 669–675.  
511
- 512 Wallinger C, Sint D, Baier F *et al.* (2015) Detection of seed DNA in regurgitates of  
513 granivorous carabid beetles. *Bulletin of Entomological Research*, **1**, 1-8.  
514
- 515 Wallinger C, Staudacher K, Schallhart N, Peter E, Dresch P, Juen A, Traugott M  
516 (2013). The effect of plant identity and the level of plant decay on molecular gut  
517 content analysis in a herbivorous soil insect. *Molecular Ecology Resources*, **13**, 75–  
518 83.  
519
- 520 Welch KD, Schofield MR, Chapman EG, Harwood JD (2014) Comparing rates of  
521 springtail predation by web-building spiders using Bayesian inference. *Molecular*  
522 *Ecology*, **23**, 3814-3825.  
523
- 524

525 **Figure 1** Prey DNA detection success in the predatory carabid beetle *Pterostichus*  
526 *melanarius* for regurgitates (A), whole bodies (B) and feces (C). Detection rates are  
527 provided for the different time points examined within each dietary sample and for the  
528 three target DNA fragment sizes. Circles and dashed lines indicate actual measures.  
529 Bold solid lines indicate the logistic regressions estimated from the glmm model and the  
530 shaded area the 95% confidence interval envelopes of the fit. The horizontal line  
531 represents the 50% prey DNA detection probability. Corresponding lower and upper  
532 95% confidence limits are presented in Table 2.

533  
534 **Figure 2** Estimated time points post-feeding for a 50% prey DNA detection probability  
535 for the different types of dietary samples and DNA fragment sizes. Provided are the  
536 50% prey detection probabilities in hours post-feeding.  
537

538 **Table 1** Detection rates of small (128 bp), medium (332 bp) and large (612 bp) prey  
539 DNA fragments of the mealworm *Tenebrio molitor* fed to the carabid *Pterostichus*  
540 *melanarius* in whole beetles, regurgitates, and feces. *N* is the number of samples  
541 analyzed per digestion time.  
542

543

544

545

546

547

### DNA extracted from whole bodies

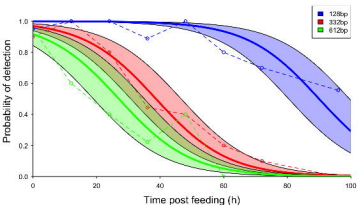

### DNA extracted from regurgitates

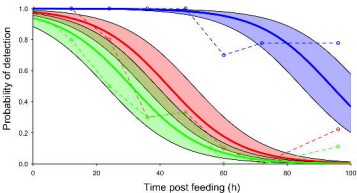

### DNA extracted from faeces

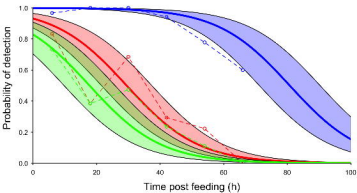

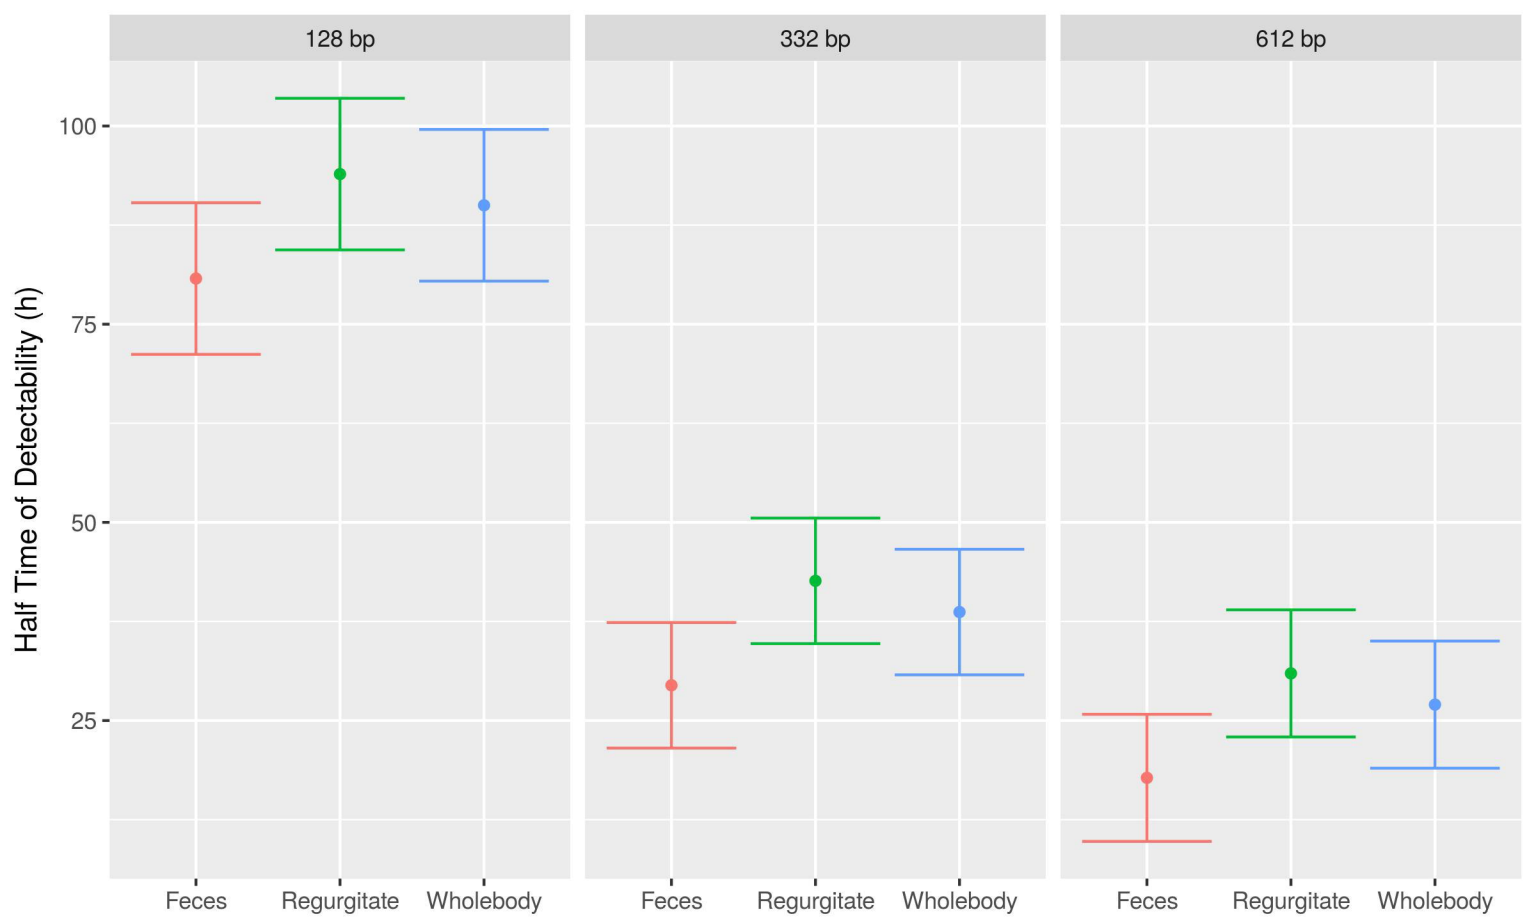

---



---

 Detection rate per fragment size (%)
 

---

| Dietary sample | Digestion time (h) | <i>n</i> | Small (128 bp) | Medium (332 bp) | Large (612 bp) |
|----------------|--------------------|----------|----------------|-----------------|----------------|
| Whole bodies   | 0                  | 20       | 95             | 90              | 95             |
|                | 12                 | 10       | 100            | 100             | 60             |
|                | 24                 | 10       | 100            | 80              | 40             |
|                | 36                 | 9        | 78             | 44              | 22             |
|                | 48                 | 10       | 100            | 40              | 40             |
|                | 60                 | 10       | 80             | 20              | 0              |
|                | 72                 | 10       | 70             | 10              | 0              |
|                | 96                 | 9        | 56             | 0               | 0              |
| Regurgitates   | 0                  | 11       | 100            | 100             | 100            |
|                | 12                 | 10       | 100            | 100             | 80             |
|                | 24                 | 10       | 100            | 80              | 50             |
|                | 36                 | 10       | 100            | 30              | 30             |
|                | 48                 | 9        | 100            | 33              | 33             |
|                | 60                 | 10       | 70             | 10              | 0              |
|                | 72                 | 9        | 78             | 0               | 0              |
|                | 96                 | 9        | 78             | 22              | 11             |
| Feces          | 3                  | 8        | 100            | 87,5            | 100            |
|                | 6                  | 13       | 92             | 69              | 69             |
|                | 9                  | 5        | 100            | 100             | 60             |
|                | 12                 | 4        | 100            | 100             | 50             |
|                | 15                 | 7        | 100            | 43              | 57             |
|                | 21                 | 2        | 100            | 50              | 50             |
|                | 24                 | 4        | 100            | 25              | 0              |
|                | 27                 | 12       | 100            | 75              | 50             |
|                | 30                 | 2        | 100            | 50              | 50             |
|                | 33                 | 5        | 100            | 60              | 40             |
|                | 39                 | 9        | 100            | 22              | 11             |
|                | 42                 | 3        | 67             | 0               | 0              |
|                | 45                 | 2        | 100            | 0               | 0              |
|                | 48                 | 3        | 100            | 100             | 100            |
|                | 51                 | 4        | 100            | 0               | 25             |
|                | 54                 | 2        | 50             | 0               | 0              |
|                | 57                 | 1        | 100            | 100             | 0              |
| 58             | 1                  | 100      | 100            | 0               |                |
| 60             | 1                  | 0        | 0              | 0               |                |
| 64             | 1                  | 100      | 0              | 0               |                |
| 70             | 3                  | 67       | 0              | 0               |                |
| 76             | 1                  | 0        | 0              | 0               |                |
